# Supplementary material
Source: Elsevier journal article supplement (https://www.sciencedirect.com/science/article/pii/S0212656717305218)
Supplement: mmc1 [file S0212656717305218:mmc1.pdf]

## PRIMERA INSULINA BIOSIMILAR

## CONTENIDO:

|                                    |   |
|------------------------------------|---|
| ¿Qué es un medicamento biosimilar? | 1 |
| Insulina biosimilar: Abasaglar®    | 2 |
| Evidencia científica               | 3 |
| Conclusiones                       | 4 |

Puntos de interés especial:

- Los medicamentos biosimilares son similares pero no idénticos, no son genéricos.

- La autorización de un biosimilar se basa en la **demostración de biosimilitud** con el medicamento de referencia.

- Los biosimilares ofrecen una alternativa asequible y equivalente desde el punto terapéutico a productos de referencia

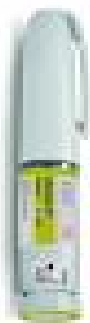

## 1.- ¿QUÉ ES UN MEDICAMENTO BIOSIMILAR?

Los medicamentos biosimilares son versiones similares de fármacos biológicos (medicamento de referencia) elaborados mediante procesos biotecnológicos.

El principio activo del biosimilar y su medicamento de referencia es esencialmente la misma sustancia biológica. En ambos, cambios en las diferentes etapas del proceso de fabricación (línea celular, medio de cultivo, condiciones, purificación, etc), puede dar lugar a una variabilidad natural en actividad/inmunogenicidad en las moléculas de la misma sustancia activa, en particular en los diferentes lotes del medicamento.

Tabla 1: Comparativa de los medicamentos biosimilares y los medicamentos genéricos.

|                               | BIOSIMILARES                                                              | GENÉRICOS                                            |
|-------------------------------|---------------------------------------------------------------------------|------------------------------------------------------|
| <b>Estructura molecular</b>   |                                                                           |                                                      |
|                               | Compleja                                                                  | Sencilla                                             |
|                               | Difícil de reproducir<br>Elevado peso molecular<br>Capacidad inmunogénica | Fácilmente reproducible<br>Bajo peso molecular<br>NO |
| <b>Desarrollo</b>             |                                                                           |                                                      |
| Tiempo                        | 6-7 años                                                                  | 2-3 años                                             |
| Inversión                     | 30-100 millones euros                                                     | 0.6-1.4 millones euros                               |
| <b>Regulación</b>             |                                                                           |                                                      |
| Autorización                  | Centralizada (EMA)                                                        | Nacional                                             |
| Aprobación                    | Biosimilitud                                                              | Bioequivalencia                                      |
| Necesidad de ensayos clínicos | Sí                                                                        | No/Biodisponibilidad                                 |

**BIOSIMILARES**

vs

**GENÉRICOS**

Los biosimilares son **versiones similares**, a diferencia de los genéricos que son copias idénticas obtenidas por síntesis química.

Los biosimilares se rigen por una regulación específica muy exigente, superando a la de los genéricos (Tabla 1).

Desde 2006 se han autorizado 15 productos biosimilares disponibles en la Unión Europea.

El proceso de autorización por la Agencia Europea del Medicamento (EMA), garantiza que la variabilidad no afecte a la actividad biológica, seguridad y eficacia del biosimilar.

## 2.- INSULINA BIOSIMILAR GLARGINA

Abasaglar, cuyo principio activo es GLARGINA, es la primera insulina biosimilar aprobada en la Unión Europea (2014) y la primera en Atención primaria. Se presenta en cartuchos y plumas precargadas desechables (kwikPen).

Actualmente Abasaglar® es la única insulina Glargina disponible en nuestro hospital (Valme).

### 3.- EVIDENCIA CIENTÍFICA

**ELEMENT 1 Y ELEMENT 2:** Ensayos clínicos donde participaron 1291 adultos con diabetes

**ELEMENT 1:** se comparó Glargina biosimilar con su medicamento de referencia en 535 pacientes con DMI en tratamiento con insulina de acción corta. La disminución media de HbA1c tras 6 meses fue similar en ambos grupos (0,35% y 0,46%, respectivamente). Ambos presentaron niveles inferiores al objetivo del 7% de HbA1c.

**ELEMENT 2:** se compararon los tratamientos con Glargina biosimilar o el de referencia en 756 pacientes con DM2 tratados con antidiabéticos orales. La HbA1c media tanto en naïve a insulinización como en los previamente tratados con glargina de referencia cayó por debajo del 7 % en ambos, con una caída media de 1,29 y 1,34 puntos porcentuales, respectivamente.

TABLA. Análisis por subgrupos. No se observan diferencias significativas.

| ELEMENT 2                                                  | Naive                 |                     | Tratados previamente con Glargina referencia |                     |
|------------------------------------------------------------|-----------------------|---------------------|----------------------------------------------|---------------------|
|                                                            | Biosimilar<br>N=220   | Referencia<br>N=235 | Biosimilar<br>N=155                          | Referencia<br>N=144 |
| HbA1c (%)                                                  |                       |                     |                                              |                     |
| HbA1c Final                                                | 6.86± 0.07            | 6.79 ± 0.07         | 7.31 ± 0.08                                  | 7.32 ± 0.08         |
| Diferencia con basal                                       | -1.48 ± 0.07          | -1.54 ± 0.07        | -1.02 ± 0.08                                 | -1.01 ± 0.08        |
| Diferencia de media mínimos cuadrados (95%) <b>LMS Dif</b> | 0.061 (-0.091, 0.214) |                     | -0.004 (-0.193, 0.185)                       |                     |
| Objetivo HbA1c n (%)                                       |                       |                     |                                              |                     |
| <7% (<53 mmol/mol)                                         | 117 (54)              | 139 (60)            | 63 (41)                                      | 58 (41)             |
| <6.5% (<48 mmol/mol)                                       | 65 (30)               | 86 (37)             | 34 (22)                                      | 28 (20)             |

Los resultados de ambos estudios contribuyen a la evidencia de que Glargina biosimilar es una opción bien tolerada y eficaz en combinación con insulina de acción corta y antidiabéticos respectivamente.

### 4.- CONCLUSIONES

- El uso seguro de los biosimilares está garantizado gracias al marco regulatorio establecido en términos de calidad, criterios preclínicos y clínicos por autoridades reguladoras como la EMA.
- Glargina biosimilar ha demostrado en ensayos clínicos ser similar en términos de eficacia, calidad y seguridad a la Glargina de referencia.

#### ¿Por qué hacer la insulinización de un paciente naïve con Insulina Glargina biosimilar?

Los estudios publicados, ELEMENT 1 y 2 muestran que la insulina biosimilar proporciona una eficacia y seguridad similar a la Insulina Glargina de referencia en pacientes naïve .

#### ¿Puedo cambiar a un paciente con Insulina Glargina de referencia a biosimilar?

**SÍ.** El análisis de subgrupos del estudio ELEMENT 2 no muestra diferencias significativas entre usar una u otra en pacientes que hayan usado previamente Insulina Glargina de referencia

#### Referencias bibliográficas

1. Ficha técnica de Abasaglar
2. Web de la Agencia Española del Medicamento y Productos Sanitarios. <http://www.aemps.gob.es/>
3. J Rosenstock et al "Similar Efficacy and Safety of LY2963016 Insulin Glargine and Insulin Glargine (Lantus®) in Patients With Type 2 Diabetes Previously Treated With Insulin Glargine or Insulin-Naïve: A Randomized, Double-Blind Controlled Trial (THE ELEMENT 2)". *Diabetes Obes Metab* 2015 Aug;17(8):734-41
4. Blevins TC et al. "Efficacy and Safety of LY2963016 Insulin Glargine Compared With Insulin Glargine (Lantus®) in Patients With Type 1 Diabetes in a Randomized Controlled Trial (The ELEMENT 1 Study)" *Diabetes Obes Metab* 2015;17(8):726-33
